# Supplementary material for: Unit Operation and Process Modeling with Physics-Informed Machine Learning
Source: Atypon-hosted journal article supplement (doi:10.1061/joeedu.eeeng-7467), 2024-01-25
Supplement: supplemental_materials_joeedu.eeeng-7467_li.pdf [file supplemental_materials_joeedu.eeeng-7467_li.pdf]

# SUPPLEMENTAL MATERIALS

*ASCE Journal of Environmental Engineering*

## Unit Operation and Process Modeling with Physics-Informed Machine Learning

Haochen Li, David Spelman, and John Sansalone

**DOI:** 10.1061/JOEEDU.EEENG-7467

© ASCE 2023

[www.ascelibrary.org](http://www.ascelibrary.org)

## MATERIALS AND METHODS

### Case 1. continuous stirred-tank reactor (CSTR)

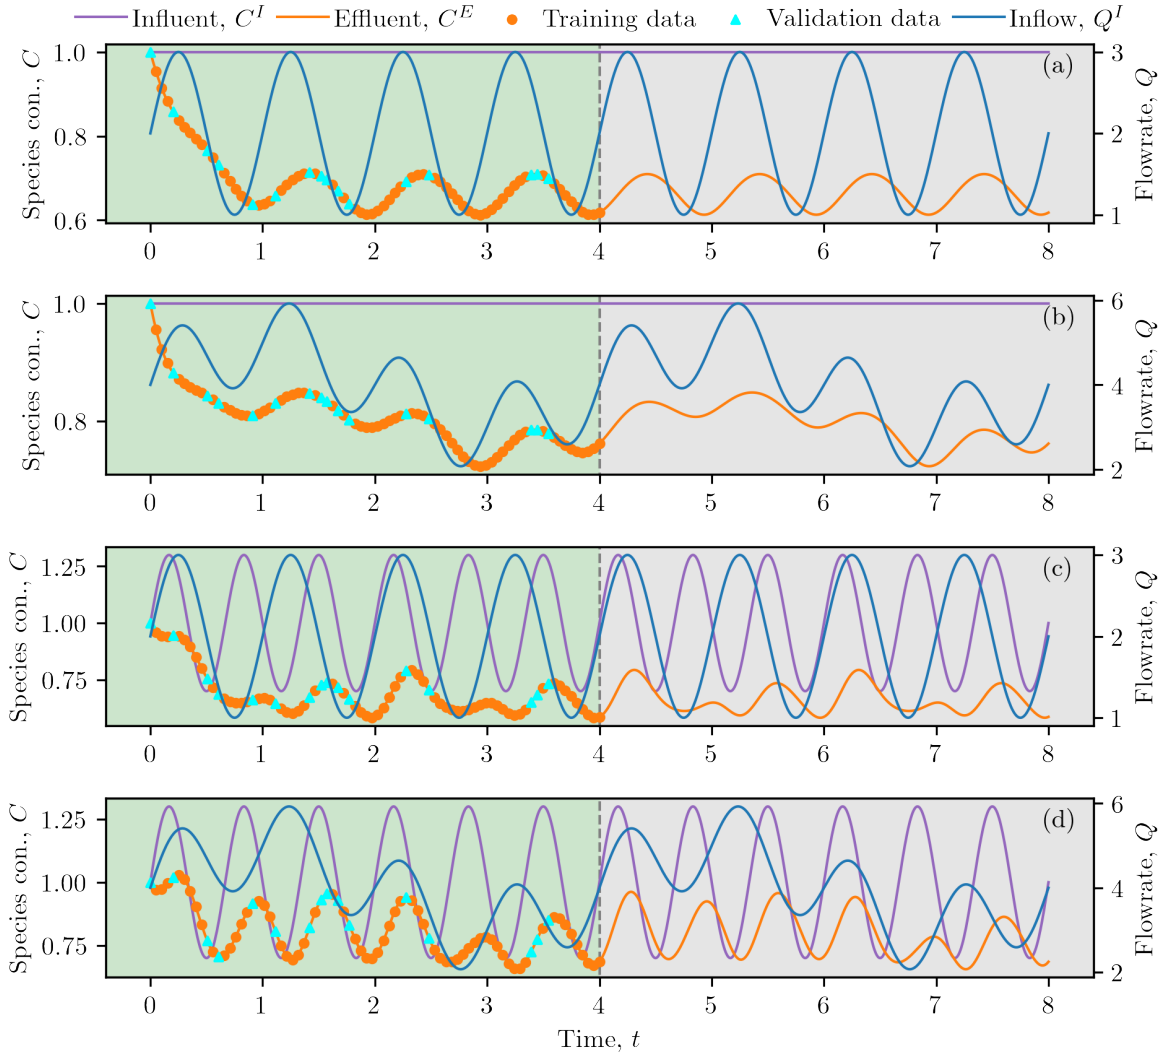

**Fig. S1.** Input loading and training data in CSTR case.

The coefficient of determination is defined in Eq. S1.

$$R^2(y, \hat{y}) = 1 - \frac{\sum_{i=1}^n (y_i - \hat{y}_i)^2}{\sum_{i=1}^n (y_i - \bar{y})^2}. \quad (\text{S1})$$

In this equation,  $\hat{y}_i$  is the predicted value of the  $i$ -th sample and  $y_i$  is the corresponding true value,  $\bar{y}$  is the mean value. A negative  $R^2$  indicates that the model poorly match the data.

## Case 2. activated sludge reactor

Full expression of activated sludge model No.1 (ASM1)

$$\frac{dS_I}{dt} = 0 \quad (S2)$$

$$\begin{aligned} \frac{dS_S}{dt} = & -\frac{1}{Y_H} \mu_H \left( \frac{S_S}{K_S + S_S} \right) \left( \frac{S_O}{K_{O,H} + S_O} \right) X_{B,H} - \frac{1}{Y_H} \mu_H \left( \frac{S_S}{K_S + S_S} \right) \left( \frac{K_{O,H}}{K_{O,H} + S_O} \right) \left( \frac{S_{NO}}{K_{NO} + S_{NO}} \right) \eta_g X_{B,H} \\ & + k_h \frac{X_S/X_{BH}}{K_X + (X_S/X_{BH})} \left[ \left( \frac{S_O}{K_{O,H} + S_O} \right) + \eta_b \left( \frac{K_{O,H}}{K_{O,H} + S_O} \right) \left( \frac{S_{NO}}{K_{NO} + S_{NO}} \right) \right] X_{BH} \end{aligned} \quad (S3)$$

$$\frac{dX_I}{dt} = 0 \quad (S4)$$

$$\begin{aligned} \frac{dX_S}{dt} = & (1 - f_p) b_H X_{BH} + (1 - f_p) b_H X_{BA} \\ & - k_h \frac{X_S/X_{BH}}{K_X + (X_S/X_{BH})} \left[ \left( \frac{S_O}{K_{O,H} + S_O} \right) + \eta_b \left( \frac{K_{O,H}}{K_{O,H} + S_O} \right) \left( \frac{S_{NO}}{K_{NO} + S_{NO}} \right) \right] X_{BH} \end{aligned} \quad (S5)$$

$$\frac{dX_{BH}}{dt} = \mu_H \left( \frac{S_S}{K_S + S_S} \right) \left( \frac{S_O}{K_{O,H} + S_O} \right) X_{BH} + \mu_H \left( \frac{S_S}{K_S + S_S} \right) \left( \frac{K_{O,H}}{K_{O,H} + S_O} \right) \left( \frac{S_{NO}}{K_{NO} + S_{NO}} \right) \eta_g X_{BH} - b_H X_{BH} \quad (S6)$$

$$\frac{dX_{BA}}{dt} = \mu_A \left( \frac{S_{NH}}{K_{NH} + S_{NH}} \right) \left( \frac{S_O}{K_{O,A} + S_O} \right) X_{BA} - b_A X_{BA} \quad (S7)$$

$$\frac{dX_p}{dt} = f_p b_H X_{BH} + f_p b_A X_{BH} \quad (S8)$$

$$\frac{dS_O}{dt} = -\frac{1 - Y_H}{Y_H} \mu_H \left( \frac{S_S}{K_S + S_S} \right) \left( \frac{S_O}{K_{O,H} + S_O} \right) X_{BH} - \frac{4.57 - Y_A}{Y_A} \mu_A \left( \frac{S_{NH}}{K_{NH} + S_{NH}} \right) \left( \frac{S_O}{K_{O,A} + S_O} \right) X_{BA} \quad (S9)$$

$$\frac{dS_{NO}}{dt} = -\frac{1 - Y_H}{2.86 Y_H} \mu_H \left( \frac{S_S}{K_S + S_S} \right) \left( \frac{K_{O,H}}{K_{O,H} + S_O} \right) \left( \frac{S_{NO}}{K_{NO} + S_{NO}} \right) \eta_g X_{B,H} + \frac{1}{Y_A} \mu_A \left( \frac{S_{NH}}{K_{NH} + S_{NH}} \right) \left( \frac{S_O}{K_{O,A} + S_O} \right) X_{BA} \quad (S10)$$

$$\begin{aligned} \frac{dS_{NH}}{dt} = & -i_{XB} \mu_H \left( \frac{S_S}{K_S + S_S} \right) \left( \frac{S_O}{K_{O,H} + S_O} \right) X_{B,H} - i_{XB} \mu_H \left( \frac{S_S}{K_S + S_S} \right) \left( \frac{K_{O,H}}{K_{O,H} + S_O} \right) \left( \frac{S_{NO}}{K_{NO} + S_{NO}} \right) \eta_g X_{BH} \\ & - \left( i_{XB} + \frac{1}{Y_A} \right) \mu_A \left( \frac{S_{NH}}{K_{NH} + S_{NH}} \right) \left( \frac{S_O}{K_{O,A} + S_O} \right) X_{BA} \end{aligned} \quad (S11)$$

$$\frac{dS_{ND}}{dt} = -k_a S_{ND} X_{BH} + k_h \frac{X_S/X_{BH}}{K_X + (X_S/X_{BH})} \left[ \left( \frac{S_O}{K_{O,H} + S_O} \right) + \eta_b \left( \frac{K_{O,H}}{K_{O,H} + S_O} \right) \left( \frac{S_{NO}}{K_{NO} + S_{NO}} \right) \right] X_{BH} (X_{ND}/X_S) \quad (S12)$$

$$\begin{aligned}
\frac{dX_{ND}}{dt} = & -\frac{i_{XB}}{14}\mu_H\left(\frac{S_S}{K_S+S_S}\right)\left(\frac{S_O}{K_{OH}+S_O}\right)X_{BH} \\
& +\frac{1}{14}\left(\frac{1-Y_H}{2.86Y_H}-i_{XB}\right)\mu_H\left(\frac{S_S}{K_S+S_S}\right)\left(\frac{K_{OH}}{K_{OH}+S_O}\right)\left(\frac{S_{NO}}{K_{NO}+S_{NO}}\right)\eta_g X_{BH} \\
& +\left(\frac{i_{XB}}{14}-\frac{1}{7Y_A}\right)\mu_A\left(\frac{S_{NH}}{K_{NH}+S_{NH}}\right)\left(\frac{S_O}{K_{OA}+S_O}\right)X_{BA}-\frac{1}{14}k_a S_{ND}X_{BH}
\end{aligned} \tag{S13}$$

In these equations,  $S_I, S_S, X_I, X_S, X_{BH}, X_{BA}, X_P, S_O, S_{NO}, S_{NH}, S_{ND}, X_{ND}, S_{ALK}$  are the 13 state variables: soluble inert organic matter, readily biodegradable substrate, particulate inert organic matter, slowly biodegradable substrate, active heterotrophic biomass, active autotrophic biomass, particulate products arising from biomass decay, oxygen, nitrate and nitrite nitrogen,  $\text{NH}_4^+ + \text{NH}_3$  nitrogen, soluble biodegradable organic nitrogen, particulate biodegradable organic nitrogen, and alkalinity.

**TABLE S1.** Stoichiometric parameters in activated sludge model 1 (ASM1).

| Name                                              | Symbol   | Value | Unit                                              |
|---------------------------------------------------|----------|-------|---------------------------------------------------|
| Autotrophic yield                                 | $Y_A$    | 0.24  | g cell COD formed (g N oxidized) <sup>-1</sup>    |
| Heterotrophic yield                               | $Y_H$    | 0.67  | g cell COD formed (g COD oxidized) <sup>-1</sup>  |
| Fraction of biomass yielding particulate products | $f_p$    | 0.08  | dimensionless                                     |
| Mass N/Mass COD in biomass                        | $i_{XB}$ | 0.08  | g N (g COD) <sup>-1</sup> in biomass              |
| Mass N/Mass COD in products from biomass          | $i_{XP}$ | 0.06  | g N (g COD) <sup>-1</sup> in particulate products |

**TABLE S2.** kinetic parameters in activated sludge model 1 (ASM1).

| Name                           | Symbol   | Value | Unit                                                    |
|--------------------------------|----------|-------|---------------------------------------------------------|
| Heterotrophic growth and decay | $\mu_H$  | 4.0   | d <sup>-1</sup>                                         |
|                                | $K_S$    | 10.0  | g COD.m <sup>-3</sup>                                   |
|                                | $K_{OH}$ | 0.2   | g (-COD).m <sup>-3</sup>                                |
|                                | $K_{NO}$ | 0.5   | g NO <sub>3</sub> -N.m <sup>-3</sup>                    |
| Anoxic growth of heterotrophs  | $b_H$    | 0.3   | d <sup>-1</sup>                                         |
|                                | $\eta_g$ | 0.8   | dimensionless                                           |
| Anoxic hydrolysis              | $\eta_h$ | 0.8   | dimensionless                                           |
| Hydrolysis                     | $k_h$    | 3.0   | g slowly biodegradable COD.(g cell COD.d) <sup>-1</sup> |
|                                | $K_X$    | 0.1   | g slowly biodegradable COD.(g cell COD) <sup>-1</sup>   |
| Autotrophic growth and decay   | $\mu_A$  | 0.5   | d <sup>-1</sup>                                         |
|                                | $K_{NH}$ | 1.0   | g NH <sub>3</sub> -N.m <sup>-3</sup>                    |
|                                | $b_A$    | 0.05  | d <sup>-1</sup>                                         |
| Ammonification                 | $K_{OA}$ | 0.4   | g (-COD).m <sup>-3</sup>                                |
|                                | $k_a$    | 0.05  | m <sup>3</sup> (g COD.d) <sup>-1</sup>                  |

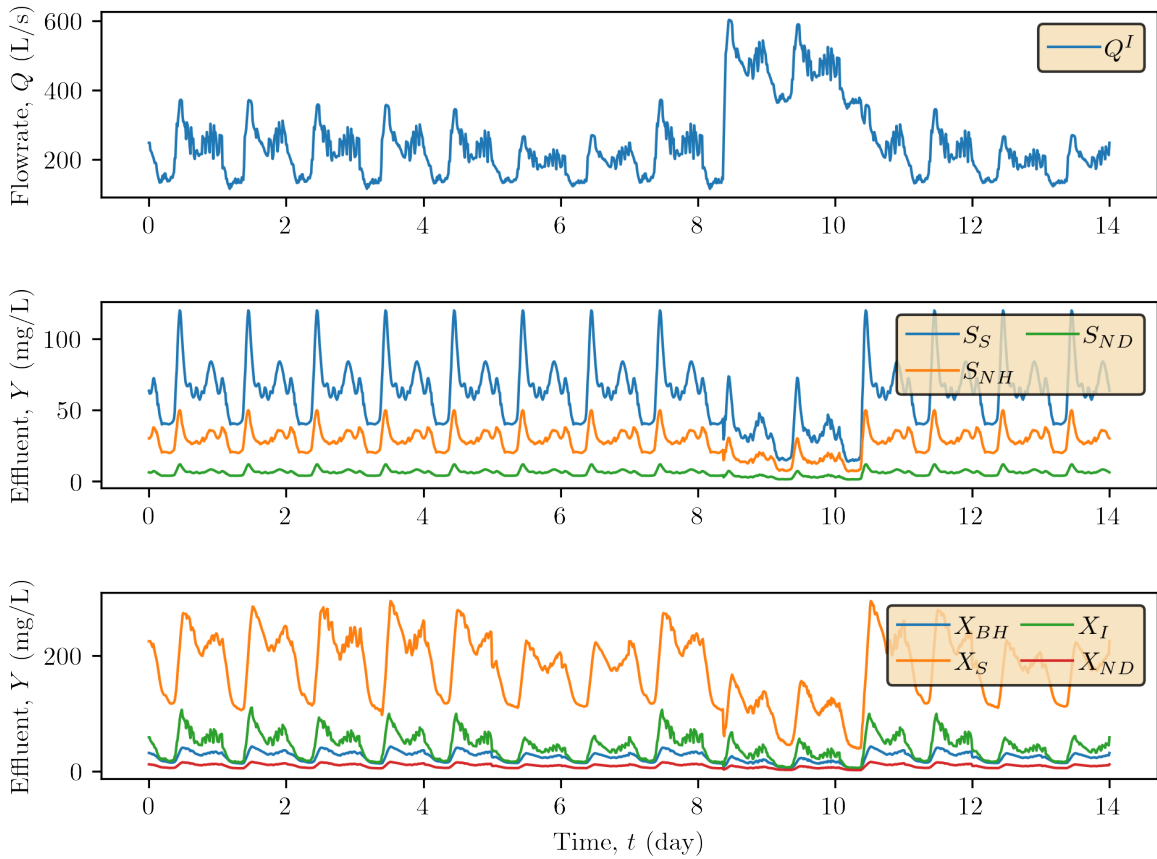

**Fig. S2.** Inflow hydrograph and influent loading graph in activated sludge reactor. The input file is publicly available at IWA website ([http://iwa-mia.org/wp-content/uploads/2019/04/Inf\\_rain\\_2006.txt](http://iwa-mia.org/wp-content/uploads/2019/04/Inf_rain_2006.txt)).

The implementation of ASM1 in this study is using Python 3.9.12. The ordinary differential equations (ODE) system of ASM1 is solved with `SciPy.integrate.solve_ivp`. The numerical implementation of ASM1 is verified with the solution of the well-established Benchmark Simulation Model No. 1 (BSM1) (Alex et al. 2018) (<http://iwa-mia.org/benchmarking/>). As summarized in Table S3, the implementation of ASM1 agrees well with the results reported by Alex et al. (2018) for the open-loop steady-state condition, with the relative differences are generally smaller than 1% except for  $S_O$ .

**TABLE S3.** Relative differences between the numerical implementation of this study and BSM1 reports for the open-loop steady-state condition. ( $S_I$ ,  $S_S$ ,  $X_I$ ,  $X_S$ ,  $X_{BH}$ ,  $X_{BA}$ ,  $X_P$ ,  $S_O$ ,  $S_{NO}$ ,  $S_{NH}$ ,  $S_{ND}$ ,  $X_{ND}$ ,  $S_{ALK}$ : soluble inert organic matter, readily biodegradable substrate, particulate inert organic matter, slowly biodegradable substrate, active heterotrophic biomass, active autotrophic biomass, particulate products arising from biomass decay, oxygen, nitrate and nitrite nitrogen,  $\text{NH}_4^+ + \text{NH}_3$  nitrogen, soluble biodegradable organic nitrogen, particulate biodegradable organic nitrogen, and alkalinity, BSM1 reports is available at <http://iwa-mia.org/benchmarking/>)

| Reactor # | $S_I$ | $S_S$  | $X_I$ | $X_S$  | $X_{BH}$ | $X_{BA}$ | $X_P$  | $S_O$  | $S_{NO}$ | $S_{NH}$ | $S_{ND}$ | $X_{ND}$ | $S_{ALK}$ | $TSS$ |
|-----------|-------|--------|-------|--------|----------|----------|--------|--------|----------|----------|----------|----------|-----------|-------|
| 1         | 0.000 | -0.001 | 0.000 | 0.000  | 0.000    | 0.003    | 0.000  | 0.000  | 0.000    | 0.000    | -0.003   | 0.001    | 0.000     | 0.000 |
| 2         | 0.000 | -0.001 | 0.000 | 0.000  | 0.000    | 0.002    | -0.001 | -0.052 | 0.001    | 0.001    | 0.000    | 0.000    | 0.000     | 0.000 |
| 3         | 0.000 | 0.000  | 0.000 | -0.001 | 0.000    | 0.000    | 0.001  | -0.001 | 0.000    | 0.000    | 0.000    | 0.001    | 0.001     | 0.000 |
| 4         | 0.000 | 0.000  | 0.000 | 0.000  | 0.000    | -0.003   | 0.001  | 0.000  | 0.000    | -0.001   | 0.000    | 0.000    | 0.001     | 0.000 |
| 5         | 0.000 | 0.001  | 0.000 | 0.000  | 0.000    | -0.001   | 0.000  | 0.000  | 0.001    | 0.002    | 0.000    | -0.001   | -0.001    | 0.000 |

### Case 3. fixed-bed granular adsorption reactor

The 1D version of fixed-bed granular adsorption reactor is defined as following

$$\phi \frac{\partial Y}{\partial t} + \frac{\partial uY}{\partial x} = \frac{\partial}{\partial x} \left( \phi D_h \frac{\partial Y}{\partial x} \right) - \phi \beta R, \quad (\text{S14})$$

$$\frac{\partial q}{\partial t} = R, \quad (\text{S15})$$

$$R = \frac{1}{\beta} k_f Y \left( 1 - \frac{q}{q_{max}} \right) - k_r q. \quad (\text{S16})$$

In this equation,  $Y$  is the dissolved phase species concentration,  $u$  is the superficial velocity for the granular media bed,  $u_p = u/\phi$  is the pore velocity,  $\phi$  is the reactor porosity,  $D_h$  is the hydrodynamic dispersion coefficient for isotropic granular media (Bear 1972; Istok 1989; Horgue et al. 2015),  $\beta = \rho_p(1 - \phi)/\phi$  represents the specific mass of the granular media (divided by the porosity  $\phi$ ),  $\rho_p$  is the granular media density,  $R$  is the total/net reaction rate,  $q$  is the mass fraction of the adsorbed phase and adsorbent (kg adsorbed/kg adsorbent),  $k_f$  is the forward (adsorption) constant and  $k_r$  is the reverse (desorption) constant,  $q_{max}$  is the adsorption capacity (kg adsorbed/kg adsorbent). The mass of adsorbent is on a dry basis.

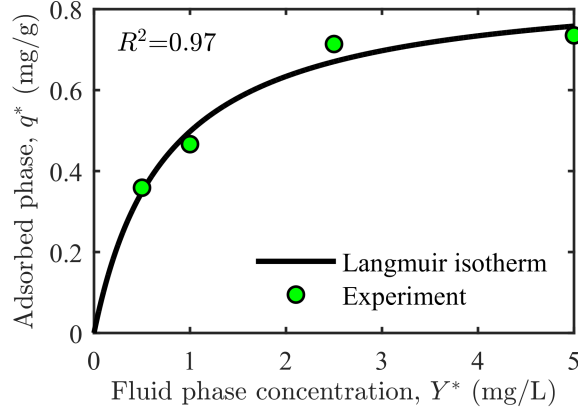

**Fig. S3.** Adsorption isotherm for AOCM-Clay media.  $q^*$  is mass fraction of adsorbed phase at adsorption equilibrium,  $Y^*$  dissolved phase species concentration at adsorption equilibrium. Experiment data from Sansalone and Ma (2011).

**TABLE S4.** Summary of input features, output feature, and the number of data pairs used for training and testing in each case. CSTR: continuous stirred tank reactor, ASR: activated sludge reactor, FBR: fixed-bed reactor,  $N_{train}$  is the number of paired data for training,  $N_{test}$  is the number of data paired for testing. In the FBR case,  $N_{test}$  is the total paired data for all loading conditions.).

| Case | Input feature | Output feature | $N_{train}$ | $N_{test}$ |
|------|---------------|----------------|-------------|------------|
| CSTR | $Q^I, Y^I, t$ | $Y^E$          | 160         | 160        |
| ASR  | $Q^I, Y^I, t$ | $Y^E$          | 480         | 864        |
| FBR  | $Y^I, t$      | $Y^E$          | 40          | 120        |

## RESULTS

### Case 1. continuous stirred-tank reactor (CSTR)

**TABLE S5.** Coefficient of determination ( $R^2$ ) and root mean square error (RMSE) of common ML models and PINNs in CSTR. ( $R^2$ /RMSE are calculated for the test period. Floats are presented to two decimal points. Loading A, B, C, and D are shown in Fig. 3a, 3b, 3c, and 3d.).

| Model       | Loading A   | Loading B  | Loading C   | Loading D  |
|-------------|-------------|------------|-------------|------------|
| Vanilla ANN | -45.08/0.23 | -7.82/0.10 | -37.91/0.37 | -3.41/0.19 |
| Lagged ANN  | 1.00/0.00   | 0.30/0.03  | -0.13/0.06  | -1.85/0.15 |
| LSTM        | 1.00/0.00   | 0.37/0.03  | -3.23/0.12  | -3.09/0.18 |
| PINNs       | 1.00/0.00   | 1.00/0.00  | 1.00/0.00   | 1.00/0.00  |

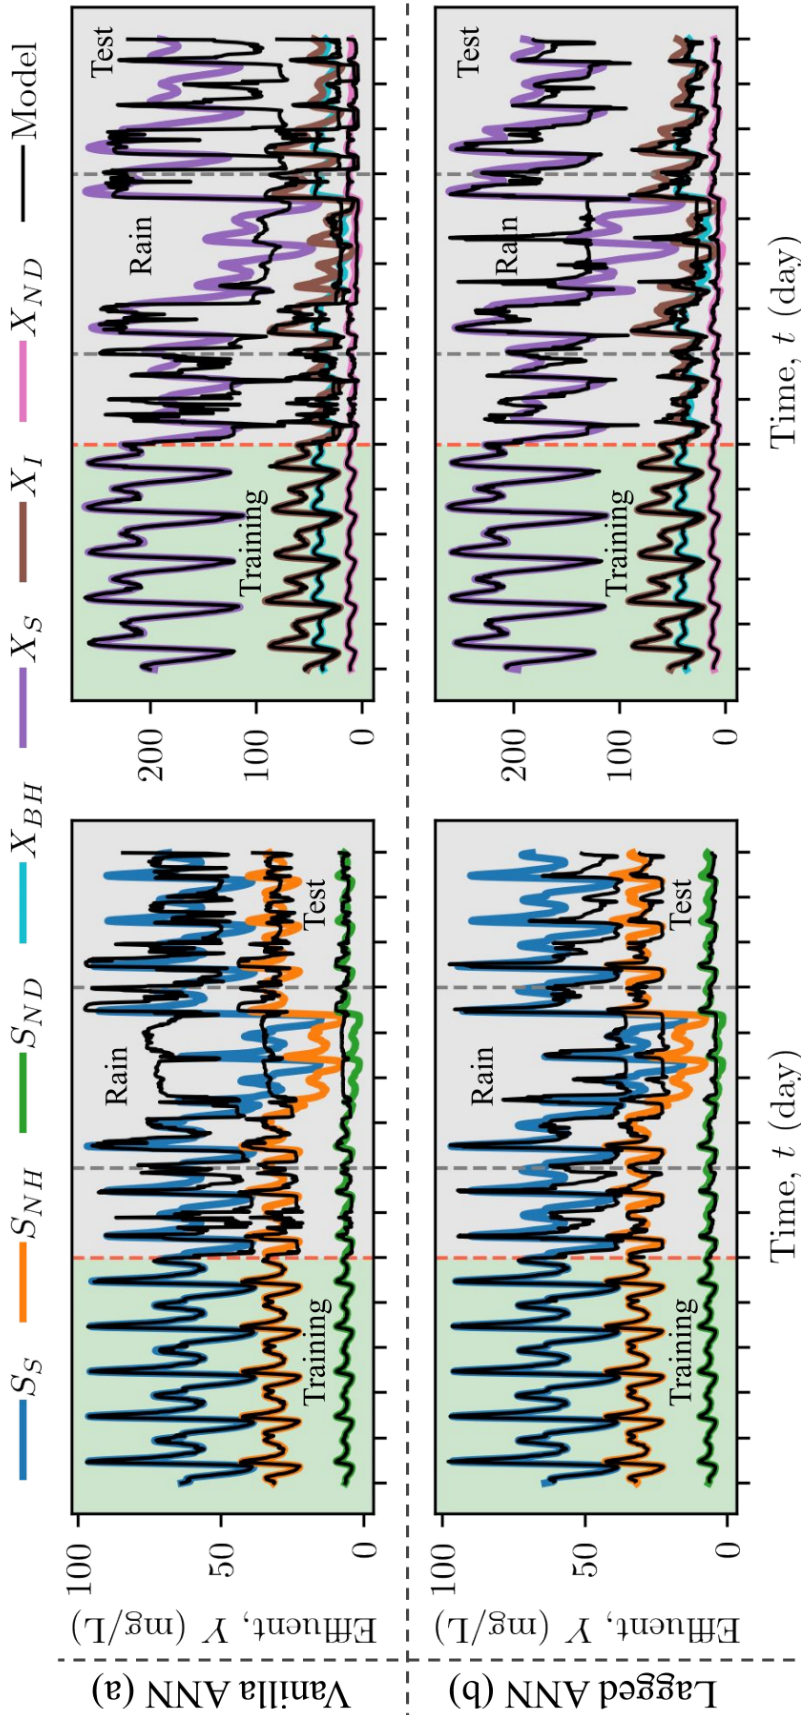

**Fig. S4.** Prediction of vanilla ANN and lagged ANN model for activated sludge reactor under wet weather loading conditions.  $S_S$ ,  $S_{NH}$ ,  $S_{ND}$ ,  $X_{BH}$ ,  $X_S$ ,  $X_I$ ,  $X_{ND}$  are readily biodegradable substrate,  $\text{NH}_4^+$  +  $\text{NH}_3$  nitrogen, soluble biodegradable organic nitrogen, active heterotrophic biomass, slowly biodegradable substrate, particulate inert organic matter, particulate biodegradable organic nitrogen. The activated sludge reactor dynamics is defined in Eq. 7 and Eqs. S2-S13. The test period includes a dry weather condition ( $5 \text{ days} < t \leq 7 \text{ days}$ ), a rain event ( $7 \text{ days} < t \leq 11 \text{ days}$ ) and a post event ( $t > 11 \text{ days}$ ). Coefficients of determination ( $R^2$ ) are summarized in Table S5.



## Case 2. activated sludge reactor

**TABLE S6.** Coefficient of determination ( $R^2$ ) and root mean square error (RMSE) of common ML models and PINNs in activated sludge reactor. (Dry weather: 5 days  $< t \leq 7$  days; Rain event: 7 days  $< t \leq 11$  days; Post event:  $t > 11$  days.  $R^2$ /RMSE are averaged for  $S_S$ ,  $S_{NH}$ ,  $S_{ND}$ ,  $X_{BH}$ ,  $X_S$ ,  $X_I$ , and  $X_{ND}$ . Floats are presented to two decimal points.).

| Model       | Dry weather | Rain event  | Post event  |
|-------------|-------------|-------------|-------------|
| Vanilla ANN | -0.22/9.46  | -0.20/13.85 | -0.94/16.31 |
| Lagged ANN  | 0.46/5.94   | 0.59/11.26  | 0.15/8.91   |
| LSTM        | 0.83/3.15   | 0.58/11.38  | 0.81/3.94   |
| PINNs       | 1.00/0.08   | 1.00/0.09   | 1.00/0.08   |

## Case 3. fixed-bed granular adsorption reactor

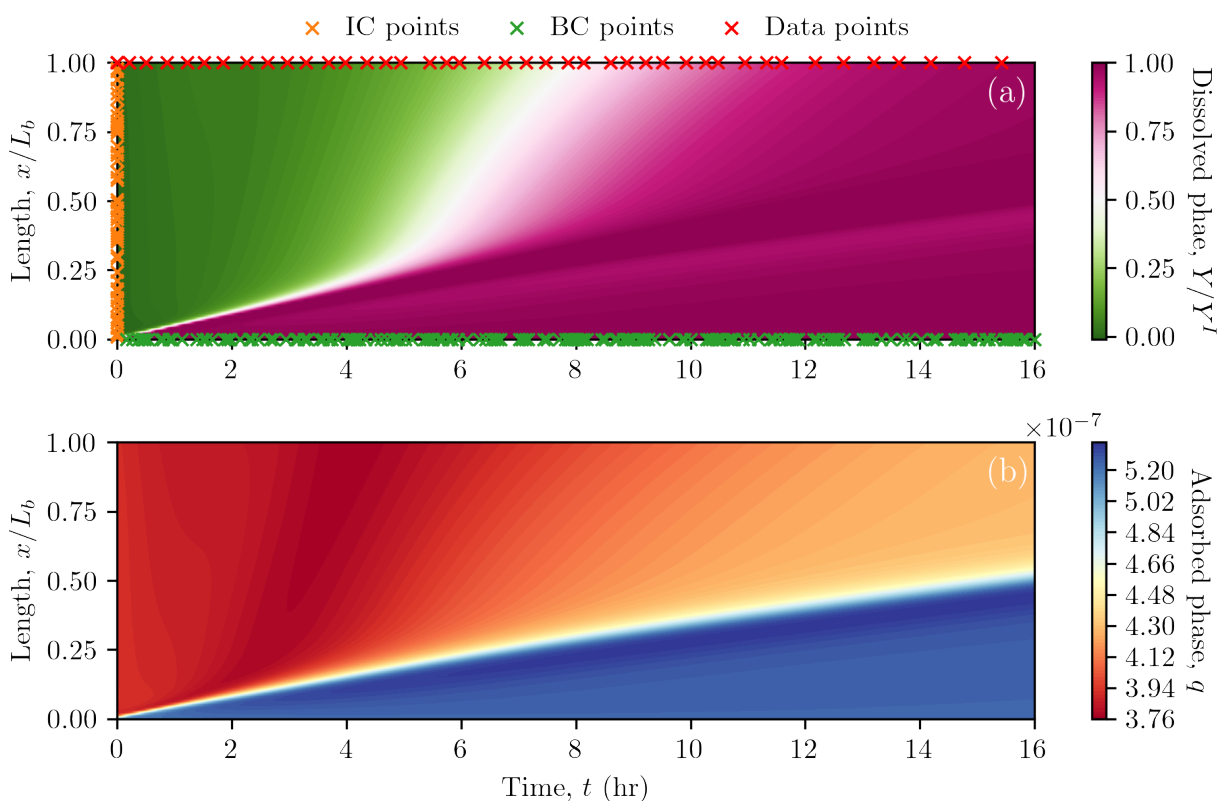

**Fig. S5.** Prediction of pure data-driven ANN in fixed-bed granular adsorption reactor. The fixed-bed granular adsorption reactor dynamics is defined in Eqs. 8-10.

**TABLE S7.** Coefficient of determination ( $R^2$ ) and root mean square error (RMSE) of common ML models and PINNs in fixed-bed granular adsorption reactor. ( $R^2$ /RMSE are presented to two decimal points. Influent TDP loading of 0.5 mg/L is for training. Influent TDP loading of 1.0, 2.5, and 5.0 mg/L are for test).

| Model       | 0.5 mg/L  | 1.0 mg/L   | 2.5 mg/L   | 5.0 mg/L   |
|-------------|-----------|------------|------------|------------|
| Vanilla ANN | 1.00/0.02 | -0.24/0.38 | -1.79/0.54 | -4.29/0.66 |
| Lagged ANN  | 1.00/0.02 | -1.40/0.53 | -3.12/0.66 | -5.49/0.74 |
| LSTM        | 1.0/0.02  | -1.05/0.49 | -3.17/0.66 | -5.57/0.74 |
| PINNs       | 1.0/0.02  | 0.93/0.09  | 0.74/0.16  | 0.58/0.19  |

## DISCUSSION

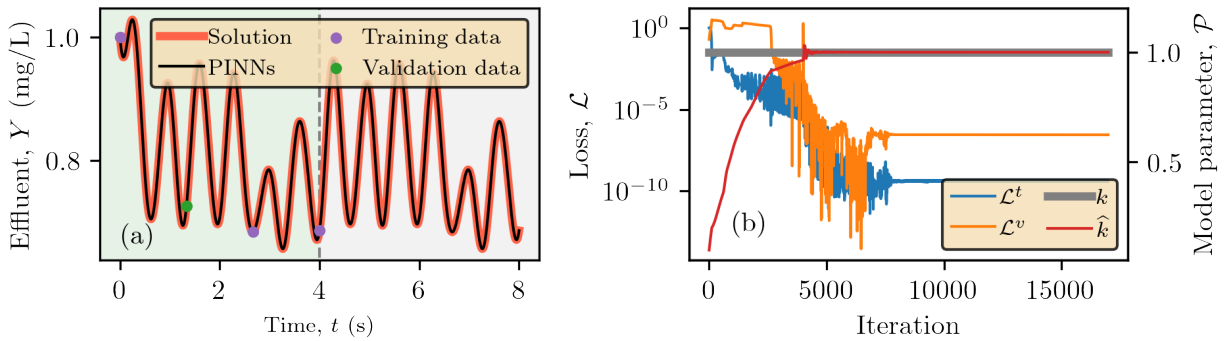

**Fig. S6.** PINNs model prediction in a continuous stirred-tank reactor (CSTR) with limited training data. The CSTR configuration and loading condition is identical to Fig. 3d.

## REFERENCES

- Alex, J., Benedetti, L., Copp, J., Gernaey, K., Jeppsson, U., Nopens, I., Pons, M., Steyer, J., and Vanrolleghem, P., 2018. *Benchmark Simulation Model no. 1 (BSM1)*. Technical Report. International Water Association. London, United Kingdom.
- Bear, J., 1972. *Dynamics of Fluids in Porous Media*. Dover Publications, New York, NY.
- Horgue, P., Soulaire, C., Franc, J., Guibert, R., and Debenest, G., 2015. “An open-source toolbox for multiphase flow in porous media”. *Computer Physics Communications* 187: 217–226. <https://doi.org/10.1016/j.cpc.2014.10.005>.
- Istok, J., 1989. “Derivation of Equations of Solute Transport”, in: *Groundwater Modeling by the Finite Element Method*. American Geophysical Union, Washington, D.C., pp. 469–477. <https://agupubs.onlinelibrary.wiley.com/doi/abs/10.1002/9781118665541.app3>, <https://doi.org/https://doi.org/10.1002/9781118665541.app3>.
- Sansalone, J., and Ma, J., 2011. “Parametric Analysis and Breakthrough Modeling of Phosphorus from Al-Oxide Filter Media”. *Journal of Environmental Engineering* 137 (2): 108–118. [https://doi.org/10.1061/\(ASCE\)EE.1943-7870.0000304](https://doi.org/10.1061/(ASCE)EE.1943-7870.0000304).
